# Supplementary material
Source: ML conference proceedings conference paper supplement (https://openreview.net/forum?id=uT0A1pjBqu)
Supplement: supplementary_material [file transferbench-appendix.pdf › transfer-bench-NIPS2025-D-B 2/transferbench-appendix.pdf]

# Supplementary materials of “TransferBench: Benchmarking Ensemble-based Black-box Transfer Attacks”

## A Methods involved in the benchmark

For this benchmark we considered the works described in Table 4. DSA method has not been directly compared since features a near-zero performance on the targeted scenarios. All the attacks has been tested on the scenarios of the original papers, achieving the same performance. Original scenarios can be found in the `transferbench/config/scenarios` path of the benchmark.

Table 4: ASR and average-queries-per-success claimed in the original papers.

| Attack        | Venue        | $m$ | HeS | HoS+R | Targeted | $p$      | $\varepsilon$     | ASR [%] | $\bar{q}$ |
|---------------|--------------|-----|-----|-------|----------|----------|-------------------|---------|-----------|
| SubSpace [15] | NeurIPS 2019 | 3   | ✓   | ✗     | ✗        | $\infty$ | 13/255            | 98.9%   | 462       |
| SimbaODS [32] | NeurIPS 2020 | 4   | ✗   | ✗     | ✓        | $\infty$ | 13/255            | 92.0%   | 985       |
| GFCS [23]     | ICLR 2022    | 4   | ✗   | ✗     | ✓        | 2        | $\sqrt{0.001d}^1$ | 60.0%   | 20        |
| BASES [8]     | NeurIPS 2022 | 20  | ✗   | ✗     | ✓        | $\infty$ | 16/255            | 99.7%   | 1.8       |
| GAA [37]      | PR 2024      | 4   | ✗   | ✗     | ✓        | $\infty$ | 16/255            | 46.0%   | 3.9       |
| DSA [29]      | Usenix 2024  | 3   | ✓   | ✓     | ✗        | $\infty$ | 16/255            | 96.9%   | 136       |
| DSWEA [16]    | PR 2025      | 10  | ✗   | ✗     | ✓        | $\infty$ | 16/255            | 96.6%   | 2.7       |

<sup>1</sup>Images included in the experiments have  $d = 3 \cdot 299 \cdot 299$  pixels, from which  $\varepsilon \approx 16.37$

## B Instructions

The TransferBench codebase is accompanied by three main instructional resources:

- The primary [Readme.md](#) provides installation guidance and a quick-start tutorial for using the API with minimal setup.
- A companion [example notebook](#) offers in-depth, hands-on instructions, demonstrating how to use the framework with varying levels of customization.
- The [attacks\\_zoo/Readme.md](#) explains the implementation of the TransferAttack protocol within the `attacks_zoo` module.
- Instructions for setting up and using the `trbench` CLI command are detailed in the dedicated [benchmark\\_tools/Readme.md](#).

Further details and the complete codebase are available on the official GitHub repository: <https://github.com/pralab/transfer-bench>.

## C Licenses of external assets

The benchmark involved external assets for the models and query-free attacks.

**Robust models** The robust models Mim-Sw-L [36], Amini-Sw-L [2], Peng-RWRN-70 [27], Barto-WRN-94 [3] have been imported from RobustBench [12] released under MIT license, except for Pub-RN-50 [30], which has been taken from its original repository, released under Apache 2.0 license.

**Black-box attacks** Query-free black box attacks involved for comparison have been imported from TransferAttack [14] under the MIT license.

## D Additional plots

We include in this section further plots not displayed in the main paper. Figure 4 include the success vs average-queries-per-success curves for the ImageNet dataset, while the same curves relative to the

833 CIFAR-10 dataset are visualized in Figure 5. Figure 6 shows aggregated success rates of the various  
834 attacks for the CIFAR-10 dataset. The empty plots are due to the fact that when the attack reaches  
zero success-rate the average-queries-per-success is not defined and curves can not be displayed.

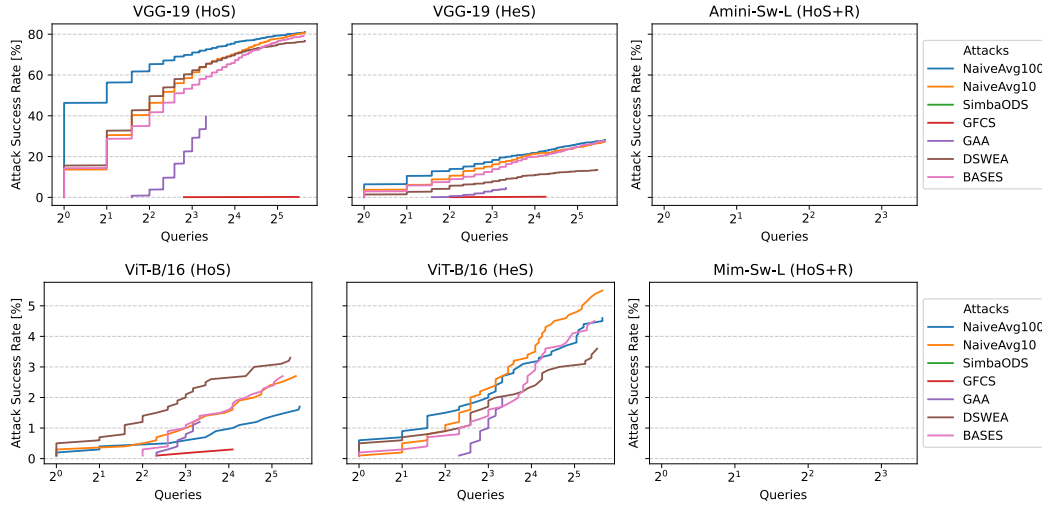

Figure 4: ASR-vs-Query curves on the ImageNet dataset.

835

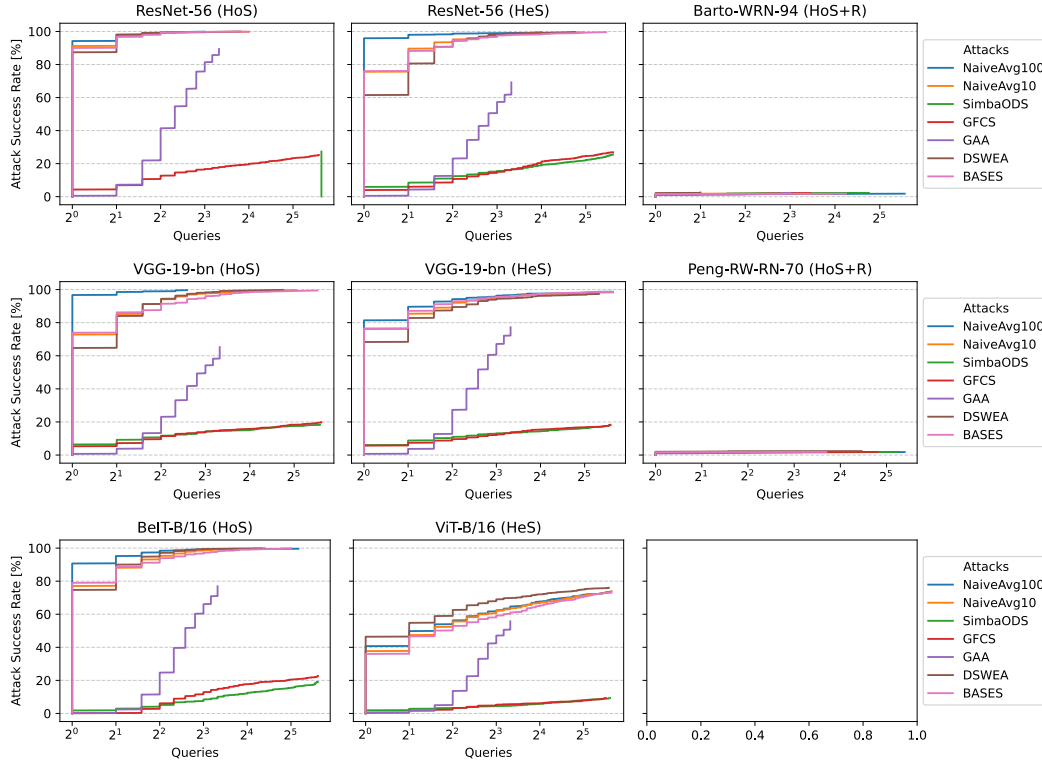

Figure 5: ASR-vs-Query curves on the ImageNet dataset for different victims.

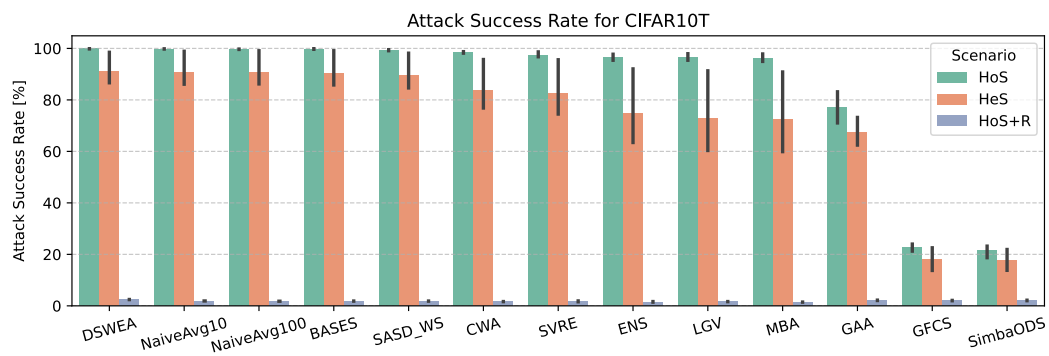

Figure 6: Aggregated attack success rate on the CIFAR10 dataset. Various attacks have a perfect success rate
